# Supplementary material for: Time Perspective and Age: A Review of Age Associated Differences
Source: PubMed Central journal article supplement (PMC5313535; doi:10.3389/fpsyg.2017.00101), 2017-02-17
Supplement: Table_1.pdf [file Table_1.pdf]

**Supplementary Table S1: Summary of studies included in the analyses**

| Paper                                        | Context the ZTPI was conducted / Previous identify manipulations | # of studies in the paper | Country where the study was conducted | Descriptive characteristics of the population  | N    | Percentage of females | Age mean | Age S.D | ZTPI RESULTS |          |          |          |         |          |          |          |          |         |
|----------------------------------------------|------------------------------------------------------------------|---------------------------|---------------------------------------|------------------------------------------------|------|-----------------------|----------|---------|--------------|----------|----------|----------|---------|----------|----------|----------|----------|---------|
|                                              |                                                                  |                           |                                       |                                                |      |                       |          |         | Mean PP*     | Mean PN* | Mean PH* | Mean PF* | Mean F* | S.D. PP* | S.D. PN* | S.D. PH* | S.D. PF* | S.D. F* |
| (Jackson, Fritch, Nagasaka, & Pope, 2003)    | Control setting / Procrastination scale                          | 1/2                       | United States                         | Undergraduate students                         | 147  | 0.71                  | 21.55    | 5.76    | 3.61         | 3.05     | 3.40     | 2.40     | 3.37    | 0.61     | 0.72     | 0.48     | 0.63     | 0.51    |
|                                              |                                                                  | 2/2                       |                                       |                                                | 160  | 0.71                  | 22.01    | 6.86    | 3.65         | 3.03     | 3.85     | 2.51     | 3.36    | 0.55     | 0.75     | 0.57     | 0.59     | 0.54    |
| (Hamilton, Kives, Micevski, & Grace, 2003)   | Control setting / none                                           | 1/1                       | Canada                                | Cardiac Rehabilitation                         | 74   | 0.24                  | 60.20    | 11.74   | 3.72         | 2.83     | 3.30     | 2.56     | 3.54    | 0.47     | 0.66     | 0.45     | 0.71     | 0.55    |
| (Juan Francisco Diaz-Morales, 2006)          | Control setting / none                                           | 1/1                       | Spain                                 | General Population                             | 756  | 0.62                  | 40.10    | N/A     | 3.29         | 2.64     | 3.05     | 2.75     | 3.56    | 0.30     | 0.30     | 0.30     | 0.30     | 0.30    |
| (Henson, Carey, Carey, & Maisto, 2006)       | Control setting / none                                           | 1/1                       | United States                         | Undergraduate and first year graduate students | 1568 | 0.53                  | 19.30    | 1.00    | N/A          | N/A      | 3.40     | 2.40     | 3.60    | N/A      | N/A      | 0.48     | 0.54     | 0.53    |
| (Mello & Worrell, 2006)                      | Control setting / none                                           | 1/1                       | United States                         | Internship population                          | 722  | 0.53                  | 14.50    | 1.40    | 3.40         | 3.19     | 3.39     | 2.56     | 3.35    | 0.54     | 0.71     | 0.52     | 0.63     | 0.56    |
| (Milfont & Gouveia, 2006)                    | Control setting / Values questionnaire                           | 1/1                       | Brazil                                | Undergraduate                                  | 247  | 0.41                  | 22.47    | 4.19    | 3.50         | 2.83     | 2.65     | 2.51     | 3.65    | 0.66     | 0.65     | 0.55     | 0.61     | 0.56    |
| (Storm, 2006)                                | Control setting / Shapes which have an implication on mood       | 1/1                       | Australia                             | Students in general                            | 200  | 0.62                  | 22.00    | 7.00    | N/A          | N/A      | 3.60     | 2.68     | 3.33    | N/A      | N/A      | 0.52     | 0.58     | 0.56    |
| (Ferrari & Diaz-Morales, 2007)               | Snow ball approach in house / Procrastination scale              | 1/1                       | Spain                                 | General Population                             | 275  | 0.51                  | 49.40    | 5.55    | 3.30         | 2.60     | 2.90     | 2.70     | 3.70    | 0.65     | 0.54     | 0.55     | 0.54     | 0.53    |
| (Horstmanshof & Zimitat, 2007)               | Control setting / none                                           | 1/1                       | Australia                             | Undergraduate and first year graduate students | 347  | 0.65                  | 22.00    | N/A     | 3.53         | 3.27     | 3.43     | 2.58     | 3.40    | 0.55     | 0.63     | 0.42     | 0.55     | 0.49    |
| (Livneh & Martz, 2007)                       | Control setting / none                                           | 1/1                       | United States                         | Diabetes patients with complications           | 106  | 0.66                  | 48.90    | 14.40   | 3.59         | 3.07     | 3.34     | 2.62     | 3.47    | 0.75     | 0.73     | 0.61     | 0.67     | 0.52    |
| (Sircova et al., 2007)                       | Control setting / none                                           | 1/1                       | Russia                                | General Population                             | 1136 | N/A                   | 27.24    | N/A     | 3.37         | 2.66     | 3.57     | 3.63     | 2.69    | 0.58     | 0.66     | 0.61     | 0.63     | 0.71    |
| (Worrell & Mello, 2007)                      | Control setting / none                                           | 1/1                       | United States                         | Academically Talented Population               | 815  | 0.53                  | 14.40    | N/A     | 3.40         | 3.19     | 3.39     | 2.56     | 3.35    | 0.54     | 0.71     | 0.52     | 0.63     | 0.56    |
| (J. F. Diaz-Morales, Ferrari, & Cohen, 2008) | Control setting / Procrastination scale                          | 1/1                       | Spain                                 | General Population                             | 509  | 0.50                  | 49.78    | 6.14    | 3.30         | 2.64     | 2.88     | 2.76     | 3.71    | 0.66     | 0.59     | 0.55     | 0.60     | 0.55    |
| (Pluck et al., 2008)                         | Control setting / IQ test                                        | 1/2                       | United Kingdom                        | Homeless                                       | 50   | 0.16                  | 33.40    | 7.55    | 3.05         | 3.73     | 3.59     | 3.21     | 3.02    | 0.65     | 0.60     | 0.48     | 0.66     | 0.49    |
|                                              |                                                                  | 2/2                       |                                       | General Population                             | 50   | 0.16                  | 33.50    | 10.25   | 3.48         | 3.60     | 3.05     | 2.86     | 3.08    | 0.57     | 0.63     | 0.46     | 0.51     | 0.59    |
| (U. do R. Leite & Luiz, 2008)                | Control setting / none                                           | 1/2                       | Brazil                                | Students in general                            | 1528 | 0.48                  | 19.80    | 1.80    | 3.42         | 2.89     | 3.30     | 2.67     | 3.39    | 0.59     | 0.66     | 0.62     | 0.69     | 0.56    |
|                                              |                                                                  | 2/2                       |                                       |                                                | 1047 | 0.62                  | 25.11    | 9.62    | 3.51         | 2.97     | 3.00     | 2.86     | 3.52    | 0.66     | 0.65     | 0.55     | 0.73     | 0.49    |
| (Guthrie, Butler, & Ward, 2009)              | At a hair salon / Health behaviors                               | 1/1                       | United States                         | General Population                             | 525  | 0.53                  | 45.70    | 19.40   | N/A          | N/A      | 3.22     | 2.43     | 3.79    | N/A      | N/A      | 0.60     | 0.80     | 0.50    |
| (Liniauskaitė & Kairys, 2009)                | Control setting / none                                           | 1/4                       | Lithuania                             | General Population                             | 616  | 0.64                  | 26.40    | N/A     | 3.57         | 2.85     | 3.24     | 2.84     | 3.58    | 0.56     | 0.67     | 0.55     | 0.63     | 0.57    |
|                                              |                                                                  | 2/4                       |                                       |                                                | 625  | 0.41                  | 35.28    | N/A     | 3.57         | 2.85     | 3.24     | 2.84     | 3.58    | 0.56     | 0.67     | 0.55     | 0.63     | 0.57    |
|                                              |                                                                  | 3/4                       |                                       |                                                | 245  | 0.65                  | 20.70    | N/A     | 3.57         | 2.85     | 3.24     | 2.84     | 3.58    | 0.56     | 0.67     | 0.55     | 0.63     | 0.57    |
|                                              |                                                                  | 4/4                       |                                       |                                                | 40   | 0.90                  | 19.80    | N/A     | 3.57         | 2.85     | 3.24     | 2.84     | 3.58    | 0.56     | 0.67     | 0.55     | 0.63     | 0.57    |
| (V. Ortuño & Gamboa, 2009)                   | Control setting / none                                           | 1/1                       | Portugal                              | Students in general                            | 277  | 0.97                  | 22.00    | N/A     | 3.61         | 2.66     | 3.53     | 2.46     | 3.58    | 0.56     | 0.71     | 0.53     | 0.60     | 0.53    |

|                                                      |                                                              |     |                   |                                                |      |      |       |       |      |      |      |      |      |      |      |      |      |      |  |
|------------------------------------------------------|--------------------------------------------------------------|-----|-------------------|------------------------------------------------|------|------|-------|-------|------|------|------|------|------|------|------|------|------|------|--|
| 2009)                                                |                                                              |     |                   |                                                |      |      |       |       |      |      |      |      |      |      |      |      |      |      |  |
| (Petkoska & Earl, 2009)                              | Online / none                                                | 1/1 | Australia         | Retirement population                          | 366  | 0.54 | 54.00 | 3.50  | 3.65 | 2.64 | 3.22 | 2.50 | 3.55 | 0.54 | 0.73 | 0.49 | 0.65 | 0.46 |  |
| (Boniwel, Osin, Alex Linley, & Ivanchenko, 2010)     | Control setting / none                                       | 1/2 | United Kingdom    | Undergraduate                                  | 179  | 0.82 | 24.00 | N/A   | 3.00 | 3.44 | 3.40 | 3.54 | 2.60 | N/A  | N/A  | N/A  | N/A  | N/A  |  |
|                                                      |                                                              | 2/2 | Russia            |                                                | 289  | 0.54 | 22.00 | N/A   | 2.51 | 3.38 | 3.58 | 3.67 | 2.49 | N/A  | N/A  | N/A  | N/A  | N/A  |  |
| (Daugherty & Brase, 2010)                            | Control setting / Money choice questionnaire                 | 1/1 | United States     | Undergraduate and first year graduate students | 467  | 0.63 | 18.99 | 1.54  | N/A  | N/A  | 3.58 | 2.54 | 3.59 | N/A  | N/A  | 0.48 | 0.57 | 0.50 |  |
| (Luyckx, Lens, Smits, & Goossens, 2010)              | Control setting / Identity style questionnaire               | 1/2 | Belgium           | First year graduate students                   | 371  | 0.78 | 18.25 | 1.26  | N/A  | N/A  | 3.41 | 2.86 | 3.27 | N/A  | N/A  | 0.45 | 0.49 | 0.45 |  |
|                                                      |                                                              | 2/2 |                   |                                                | 371  | 0.78 | 18.25 | 1.26  | N/A  | N/A  | 3.36 | 2.78 | 3.36 | N/A  | N/A  | 0.44 | 0.49 | 0.46 |  |
| (McElwee & Haugh, 2010)                              | Control setting / Clarity of future questionnaire            | 1/1 | United States     | Pre-undergraduate students                     | 684  | 0.83 | 21.65 | 6.35  | 3.64 | 3.07 | 3.40 | 2.42 | 3.47 | 0.66 | 0.75 | 0.58 | 0.63 | 0.61 |  |
| (Carelli, Wiberg, & Wiberg, 2011)                    | At home, sent questionnaire / none                           | 1/1 | Sweden            | General Population                             | 419  | 0.64 | 33.58 | N/A   | 3.58 | 2.60 | 3.16 | 2.49 | 3.36 | 0.60 | 0.69 | 0.52 | 0.51 | 0.48 |  |
| (Ely & Mercurio, 2011)                               | Control setting / none                                       | 1/1 | United States     | Undergraduate                                  | 230  | 0.51 | 19.10 | 1.60  | 3.80 | 3.00 | N/A  | N/A  | 3.40 | 0.60 | 0.70 | N/A  | N/A  | 0.60 |  |
| (Protogerou & Turner-Cobb, 2011)                     | Control setting / none                                       | 1/2 | United Kingdom    | Students in general                            | 93   | 0.71 | 20.00 | 3.03  | N/A  | N/A  | 3.52 | 2.84 | 3.36 | N/A  | N/A  | 0.60 | 0.55 | 0.42 |  |
|                                                      |                                                              | 2/2 | Greece            |                                                | 104  | 0.73 | 22.00 | 4.18  | N/A  | N/A  | 3.60 | 2.91 | 3.28 | N/A  | N/A  | 0.53 | 0.62 | 0.49 |  |
| (Wittmann et al., 2011)                              | Control setting / Mindfulness questionnaire                  | 1/1 | United States     | Undergraduate                                  | 27   | 0.44 | 21.10 | 2.20  | N/A  | N/A  | 3.65 | 2.33 | 3.43 | N/A  | N/A  | 0.43 | 0.57 | 0.48 |  |
| (Zhang & Howell, 2011)                               | Control setting / Life satisfaction                          | 1/1 | United States     | Undergraduate                                  | 754  | 0.70 | 25.02 | 9.16  | 3.50 | 3.06 | 3.36 | 2.51 | 3.49 | 0.59 | 0.71 | 0.53 | 0.63 | 0.51 |  |
| (Anagnostopoulos & Griva, 2012)                      | Control setting / none                                       | 1/2 | Greece            | Students in general                            | 337  | 0.67 | 20.80 | N/A   | 3.39 | 2.61 | 3.50 | 2.26 | 3.50 | 0.61 | 0.69 | 0.59 | 0.57 | 0.64 |  |
|                                                      |                                                              | 2/2 |                   |                                                | 120  | 0.59 | 28.82 | N/A   | 3.39 | 2.61 | 3.50 | 2.26 | 3.50 | 0.61 | 0.69 | 0.59 | 0.57 | 0.64 |  |
| (Baumann & Odum, 2012)                               | Control setting / none                                       | 1/1 | United States     | Undergraduate and first year graduate students | 143  | 0.59 | 19.88 | 2.40  | 3.74 | 2.94 | 3.40 | 2.23 | 3.47 | 0.53 | 0.67 | 0.48 | 0.52 | 0.48 |  |
| (Cretu, 2012)                                        | Control setting / none                                       | 1/1 | Romania           | Romanian ethnics                               | 1260 | 0.63 | 30.66 | N/A   | 4.49 | 3.32 | 4.69 | 3.39 | 5.55 | 1.63 | 1.83 | 1.58 | 1.38 | 1.35 |  |
| (Desmyter & De Raedt, 2012)                          | At home / none                                               | 1/1 | Belgium           | General Population                             | 149  | 0.58 | 75.50 | 7.00  | 3.48 | 2.89 | 3.06 | 3.11 | 3.37 | 0.44 | 0.69 | 0.52 | 0.54 | 0.42 |  |
| (Gruber, Cunningham, Kirkland, & Hay, 2012)          | Online / none                                                | 1/2 | United States     | Undergraduate                                  | 509  | 0.59 | 19.35 | 4.32  | 3.53 | 2.95 | 3.29 | 2.43 | 3.46 | 0.61 | 0.66 | 0.61 | 0.62 | 0.59 |  |
|                                                      |                                                              | 2/2 |                   |                                                | 509  | 0.59 | 19.35 | 4.32  | 3.10 | 3.28 | 3.50 | 2.68 | 3.24 | 0.58 | 0.71 | 0.66 | 0.57 | 0.60 |  |
| (Ishino & Shimizu, 2012)                             | Control setting / Personal important and dream questionnaire | 1/1 | Japan             | Undergraduate                                  | 309  | 0.41 | 19.71 | 0.81  | 3.46 | 3.62 | 3.61 | 3.09 | 2.62 | 0.74 | 0.86 | 0.58 | 0.65 | 0.67 |  |
| (Merson, Guillon, Arvers, Underner, & Perriot, 2012) | Control setting / Social deprivation scale                   | 1/2 | France            | Smoking cessation people                       | 192  | 0.39 | 45.60 | N/A   | 2.80 | 3.00 | 2.70 | 2.80 | 3.10 | N/A  | N/A  | N/A  | N/A  | N/A  |  |
|                                                      |                                                              | 2/2 |                   |                                                | 192  | 0.46 | 47.00 | N/A   | 3.10 | 2.40 | 3.10 | 2.20 | 3.50 | N/A  | N/A  | N/A  | N/A  | N/A  |  |
| (McElheran, 2012)                                    | Online / none                                                | 1/1 | Canada            | General population                             | 288  | 0.79 | 37.02 | 11.83 | 3.76 | 2.74 | 3.34 | 2.24 | 3.61 | 0.68 | 0.74 | 0.50 | 0.58 | 0.50 |  |
| (Bolotova & Hachaturova, 2013)                       | Control setting / none                                       | 1/1 | Russia            | General Population                             | 295  | 0.53 | 32.00 | N/A   | 3.74 | 2.47 | 3.42 | 2.51 | 3.71 | 0.59 | 0.74 | 0.54 | 0.65 | 0.55 |  |
| (Chittaro & Vianello, 2013)                          | Online / none                                                | 1/1 | Online population | Facebook users                                 | 149  | 0.47 | 32.40 | 11.80 | 3.38 | 3.22 | 3.46 | 2.69 | 3.30 | 0.57 | 0.69 | 0.47 | 0.56 | 0.45 |  |

|                                                  |                                                        |     |                |                                                            |      |      |       |       |      |      |      |      |      |      |      |      |      |      |
|--------------------------------------------------|--------------------------------------------------------|-----|----------------|------------------------------------------------------------|------|------|-------|-------|------|------|------|------|------|------|------|------|------|------|
| (Cinan & Doğan, 2013)                            | Control setting / none                                 | 1/1 | Turkey         | Undergraduate                                              | 110  | 0.76 | 20.11 | 3.80  | 3.74 | 2.98 | 3.64 | 2.57 | 3.68 | 0.65 | 0.78 | 0.59 | 0.62 | 0.58 |
| (Daniel, Stanton, & Epstein, 2013)               | Online / none                                          | 1/2 | United States  | Specialize population                                      | 48   | 1.00 | 23.59 | 3.50  | 3.69 | 3.10 | 3.36 | 2.63 | 3.70 | 0.45 | 0.76 | 0.42 | 0.59 | 0.43 |
|                                                  |                                                        | 2/2 |                |                                                            | 48   | 1.00 | 26.22 | 5.86  | 3.80 | 3.15 | 3.33 | 2.64 | 3.62 | 0.64 | 0.59 | 0.52 | 0.57 | 0.47 |
| (Griva, Anagnostopoulos, & Potamianos, 2013)     | Breast cancer doctor's office / none                   | 1/1 | Greece         | Woman in breast cancer sessions                            | 194  | 1.00 | 51.88 | 11.00 | 3.45 | 2.53 | 2.86 | 2.50 | 3.42 | N/A  | N/A  | N/A  | N/A  | N/A  |
| (King & Gaerlan, 2013)                           | Control setting / none                                 | 1/1 | Philippines    | First year graduate students                               | 385  | 0.45 | 17.66 | 0.97  | 3.67 | 3.50 | 3.72 | 2.92 | 3.41 | 0.41 | 0.57 | 0.40 | 0.56 | 0.42 |
| (Nordhall & Agerström, 2013)                     | Control setting / Moral values questionnaire           | 1/2 | Sweden         | General Population                                         | 132  | 0.59 | 25.57 | 8.00  | N/A  | N/A  | 3.40 | 2.60 | 3.29 | N/A  | N/A  | 0.48 | 0.54 | 0.52 |
|                                                  |                                                        | 2/2 |                |                                                            | 119  | 0.78 | 26.20 | 9.00  | N/A  | N/A  | 3.40 | 2.60 | 3.29 | N/A  | N/A  | 0.48 | 0.54 | 0.52 |
| (V. E. C. Ortuño, Paixão, & Nunes Janeiro, 2013) | Control setting / none                                 | 1/2 | Portugal       | Graduate students                                          | 277  | 0.63 | 22.06 | 5.40  | 3.65 | 2.61 | 3.57 | 2.41 | 3.69 | 0.52 | 0.61 | 0.44 | 0.53 | 0.50 |
|                                                  |                                                        | 2/2 |                |                                                            | 264  | 0.92 | 19.44 | 2.85  | 3.65 | 2.61 | 3.57 | 2.41 | 3.69 | 0.52 | 0.61 | 0.44 | 0.53 | 0.50 |
| (Stolarski, Ledzińska, & Matthews, 2013)         | Control setting / Morning - Evening questionnaire      | 1/2 | Poland         | Students in general                                        | 309  | 0.70 | 22.50 | 3.50  | 3.60 | 2.81 | 3.41 | 2.40 | 3.59 | 0.60 | 0.72 | 0.55 | 0.60 | 0.57 |
|                                                  | Control setting / Carrier decision making difficulties | 2/2 | United States  | Carrier counseling                                         | 195  | 0.60 | 39.85 | 11.64 | 3.40 | 3.10 | 3.10 | 2.40 | 3.70 | 0.62 | 0.72 | 0.51 | 0.53 | 0.51 |
| (Cheong, Tucker, Simpson, & Chandler, 2014)      | Control setting / Substance use                        | 1/1 | United States  | African American youth living in disadvantaged urban areas | 344  | 0.68 | 18.86 | 5.00  | 3.69 | 3.10 | 3.60 | 2.69 | 3.64 | 0.58 | 0.76 | 0.51 | 0.69 | 0.51 |
| (Incollingo Belsky, Epel, & Tomiyama, 2014)      | Control setting / Food diaries for 4 weeks             | 1/1 | United States  | People in a weight lose treatment                          | 65   | 0.22 | 54.95 | 14.36 | 3.89 | 2.67 | 3.27 | 2.53 | 3.62 | 0.48 | 0.48 | 0.55 | 0.68 | 0.45 |
| (McKay, Worrell, Temple, Perry, & Cole, 2014)    | Control setting / none                                 | 1/3 | United Kingdom | Pre-undergraduate students                                 | 2171 | 0.50 | 13.50 | 2.00  | 3.83 | 2.97 | 3.67 | 2.64 | 3.36 | 0.78 | 1.06 | 0.74 | 0.74 | 0.87 |
|                                                  |                                                        | 2/3 | United States  | Academically talented students                             | 2171 | 0.53 | 14.50 | 3.00  | 3.49 | 2.86 | 3.60 | 2.40 | 3.48 | 0.76 | 1.07 | 0.71 | 0.76 | 0.80 |
|                                                  |                                                        | 3/3 | Australia      | General Population                                         | 2171 | 0.68 | 43.50 | 10.00 | 3.81 | 2.93 | 3.38 | 2.45 | 3.60 | 0.63 | 1.00 | 0.65 | 0.68 | 0.07 |
| (Oyanadel & Buela-Casal, 2014)                   | Work place / none                                      | 1/1 | Chile          | People receiving treatment for different health conditions | 167  | 0.70 | 42.38 | 12.25 | 3.26 | 3.66 | 3.31 | 2.36 | 0.86 | 1.04 | 0.99 | 0.90 | 0.91 | 0.86 |
| (Oyanadel, 2014)                                 | Control setting / none                                 | 1/1 | Chile          | General population                                         | 604  | 0.59 | 29.90 | 12.50 | 3.69 | 2.85 | 3.39 | 2.80 | 3.54 | N/A  | N/A  | N/A  | N/A  | N/A  |
| (Leite, 2014)                                    | Control setting / none                                 | 1/1 | Brazil         | General Population                                         | 1965 | 0.60 | 24.93 | 14.40 | 3.54 | 2.98 | 3.45 | 2.79 | 3.48 | N/A  | N/A  | N/A  | N/A  | N/A  |

### Table legend:

|   |      |                    |
|---|------|--------------------|
| * | PP   | Past Positive      |
|   | PN   | Past Negative      |
|   | PH   | Present Hedonistic |
|   | PF   | Present Fatalistic |
|   | F    | Future             |
|   | S.D. | Standard Deviation |
